# Supplementary material for: Propionibacterium acnes–induced immunopathology correlates with health and disease association
Source: JCI journal article supplement (doi:10.1172/jci.insight.124687), 2019-03-06
Supplement: sd1 [file 1]

## SUPPLEMENTAL FIGURES AND TABLE

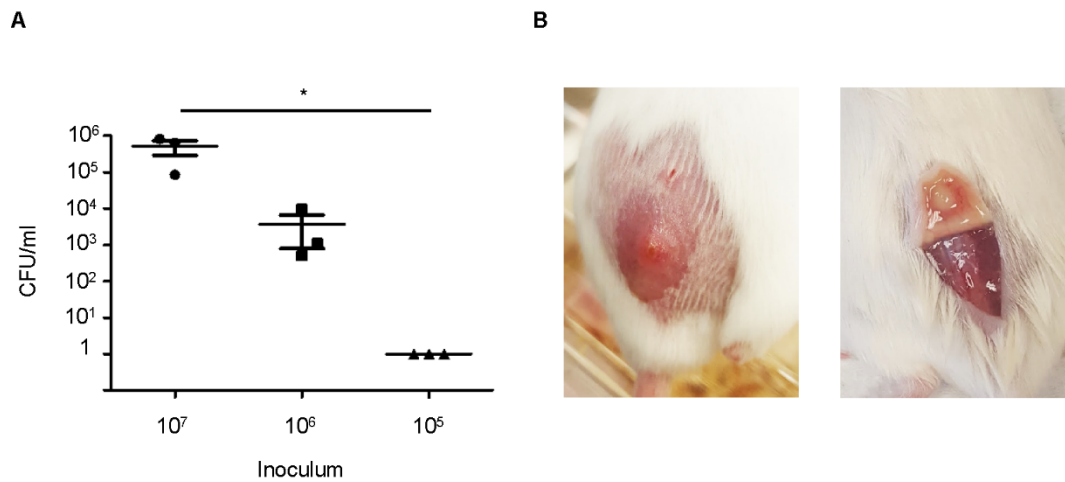

**Supplemental Figure 1. Effect of inoculum on *P. acnes* persistence on day 7.** (A) Mice were injected with three different inoculums of *P. acnes* (HL043PA1, RT5). Synthetic sebum (20  $\mu$ l) was applied topically once a day, and bacteria burden was determined on day 7.  $n = 3$  mice per group. (B) Magnified skin lesion and abscess induced by *P. acnes* HL043PA1. Data are shown as mean  $\pm$ SEM and data were analyzed using ANOVA. \*  $P < 0.05$

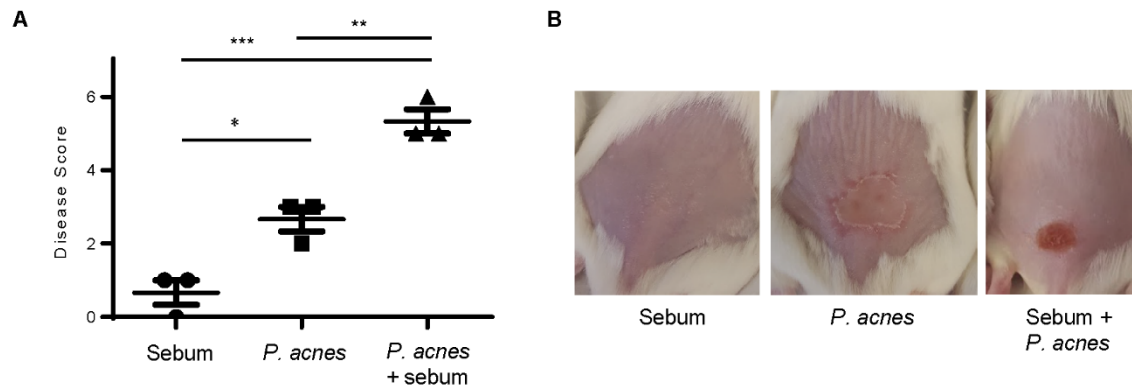

**Supplemental Figure 2. Immunopathology induced by topical application of *P. acnes***

**with or without topical sebum.** (A) Mice were shaved and naired. The next day, the mice

were tape stripped 10 times and then topically inoculated with  $1 \times 10^7$  CFU of *P.*

*acnes* (HL043PA1, RT5). Synthetic sebum (20  $\mu$ l) was applied topically once a day, and

bacteria burden was determined on day 3. n =3 mice per group. (B) Representative skin

lesions. Data are shown as mean  $\pm$ SEM and data were analyzed using ANOVA. \*  $P < 0.05$ .

**Supplemental Table 1. *P. acnes* strains used in this study**

| <b>Strain</b> | <b>Phylotype</b> | <b>Ribotype</b> | <b>Acne Association</b> |
|---------------|------------------|-----------------|-------------------------|
| HL043PA1      | I                | 5               | Acne                    |
| HL043PA2      |                  | 5               | Acne                    |
| HL056PA1      |                  | 4               | Acne                    |
| HL053PA1      |                  | 4               | Acne                    |
| HL045PA1      |                  | 4               | Acne                    |
| HL110PA3      | II               | 6               | Health                  |
| HL110PA4      |                  | 6               | Health                  |
| HL042PA3      |                  | 6               | Health                  |
| HL060PA1      |                  | 2               | Health                  |

Description of phylotypes is based on multi-locus sequencing (2) and ribotypes are based on 16S rRNA sequencing (3)
